# Supplementary material
Source: PubMed Central journal article supplement (PMC4848114)
Supplement: NIHMS768342-supplement-6.pdf [file NIHMS768342-supplement-6.pdf]

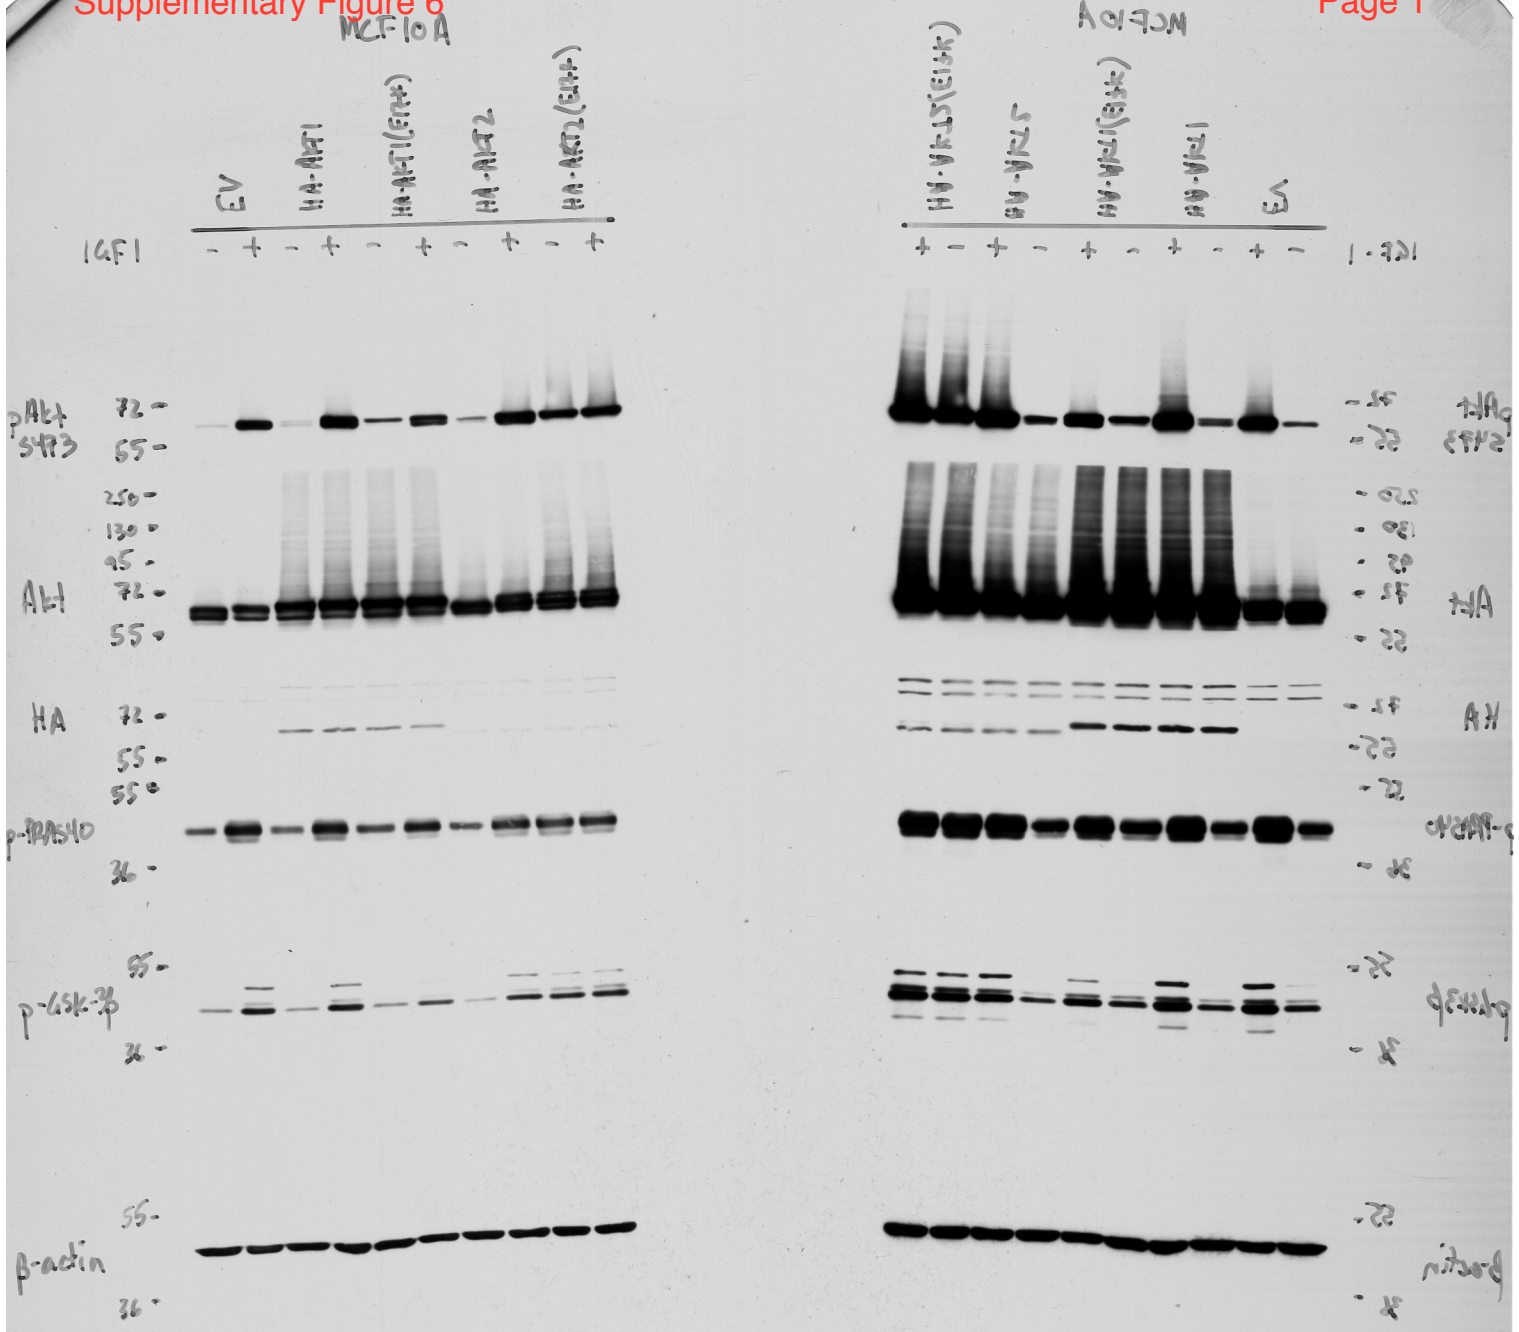

Figure 1a

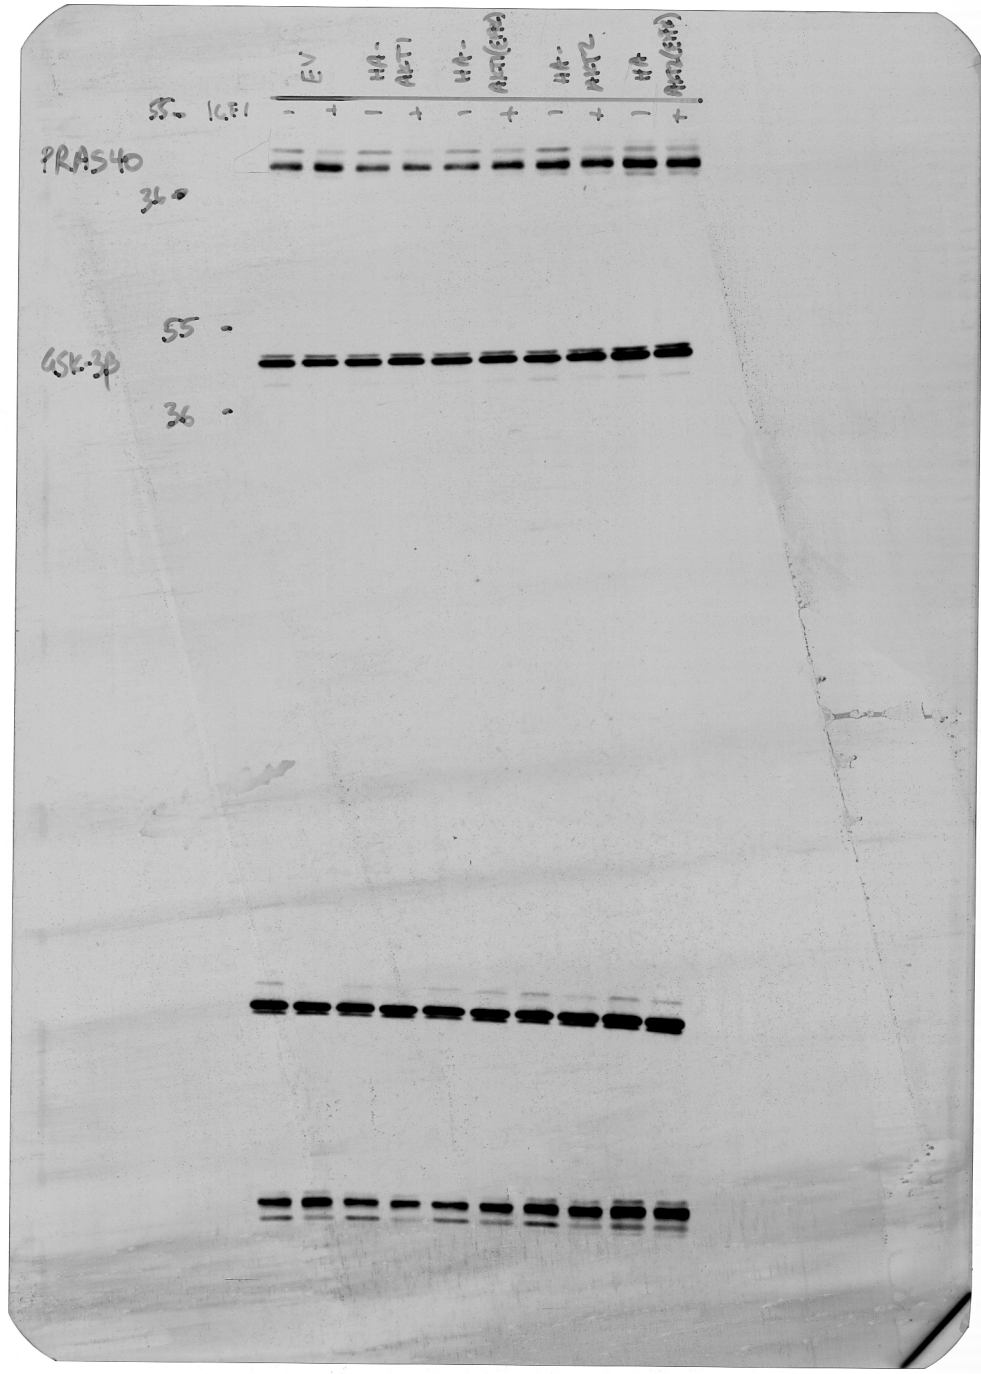

Figure 1a

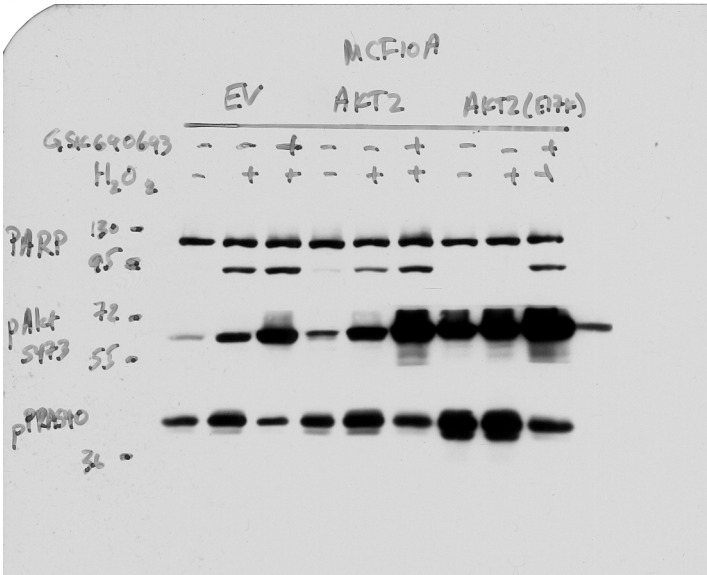

Figure 2a

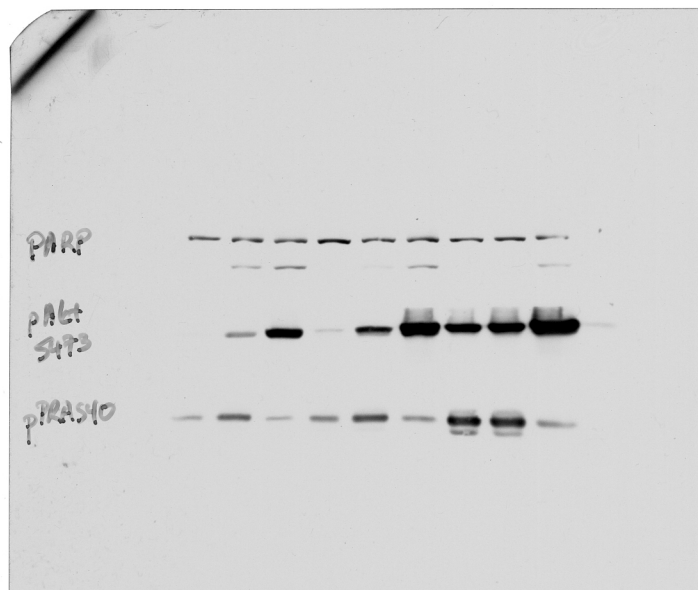

Figure 2a - Different exposure, same molecular weight and lane markers as Page 3

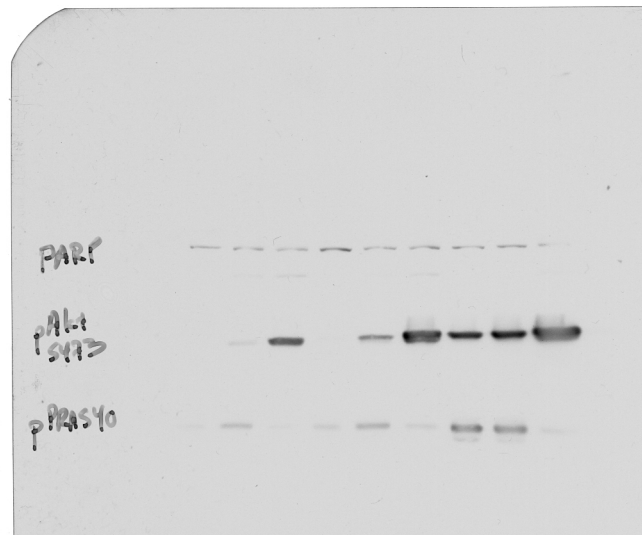

Figure 2a - Different exposure, same molecular weight and lane markers as Page 3

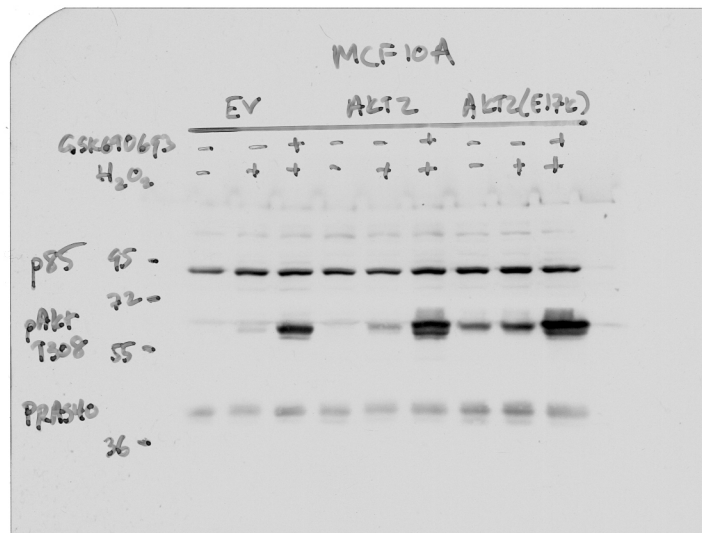

Figure 2a

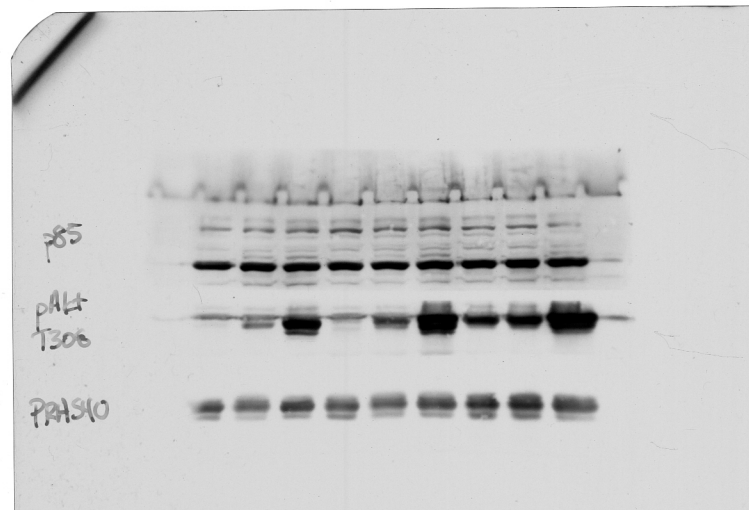

Figure 2a - Different exposure, same molecular weight and lane markers as Page 6

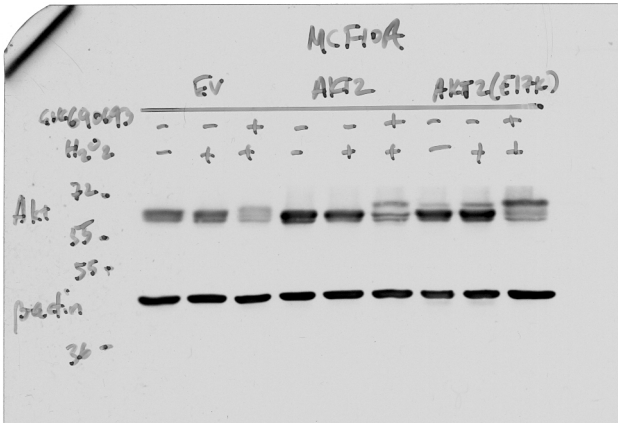

Figure 2a



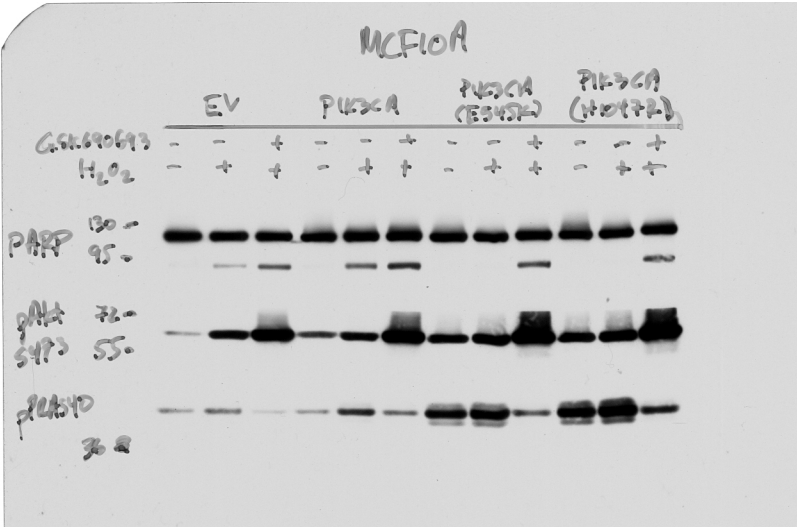

Figure 2b

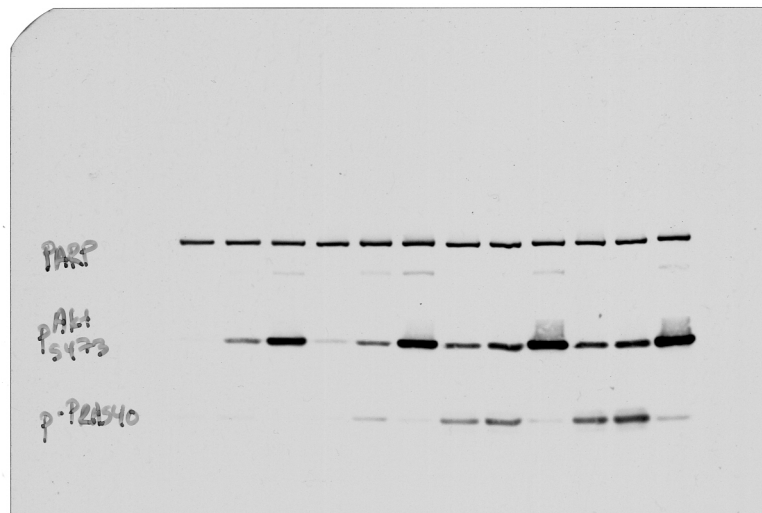

Figure 2b - Different exposure, same molecular weight and lane markers as Page 9

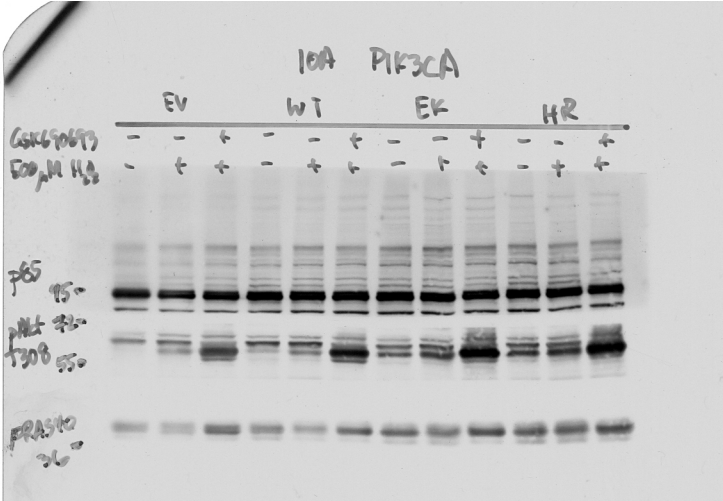

Figure 2b

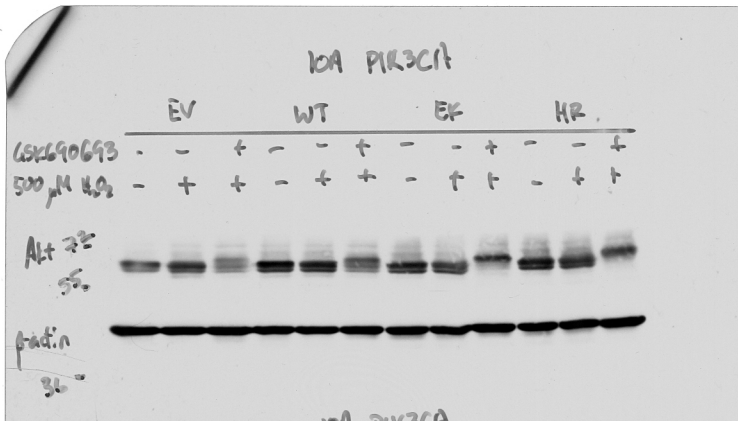

Figure 2b

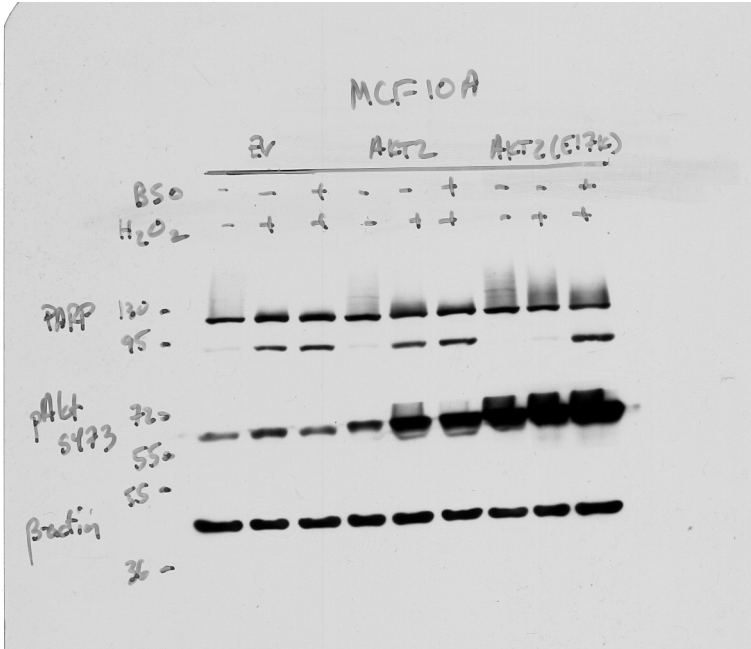

Figure 2c

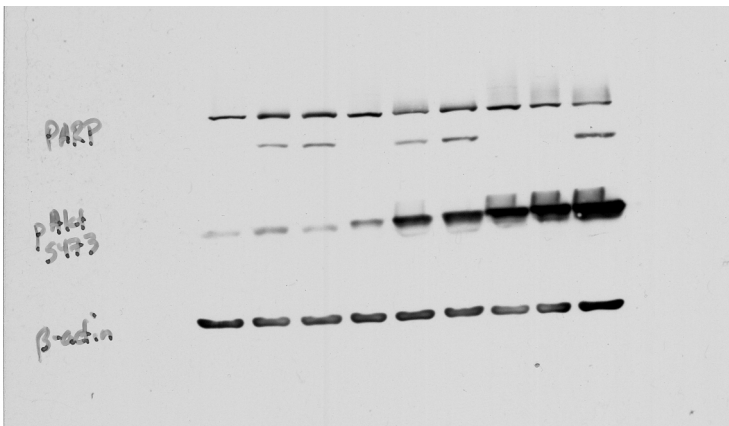

Figure 2c - Different exposure, same molecular weight and lane markers as Page 13

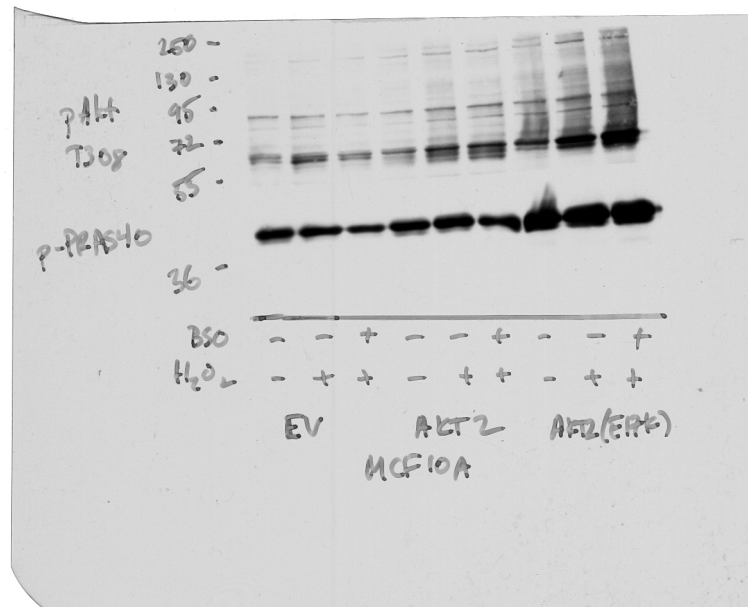

Figure 2c

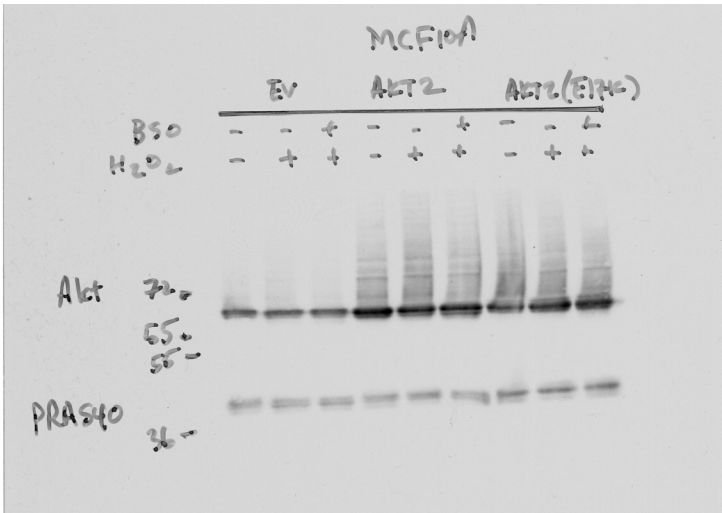

Figure 2c



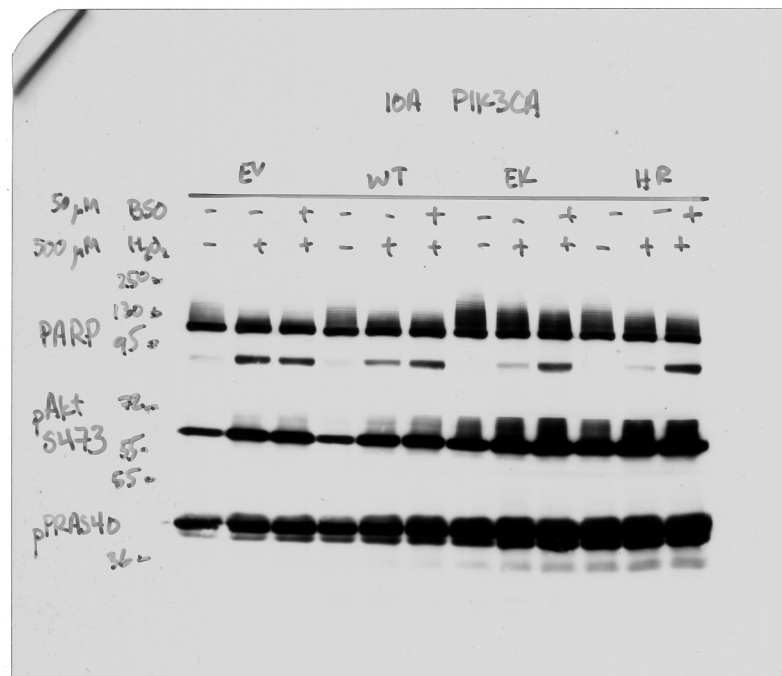

Figure 2d

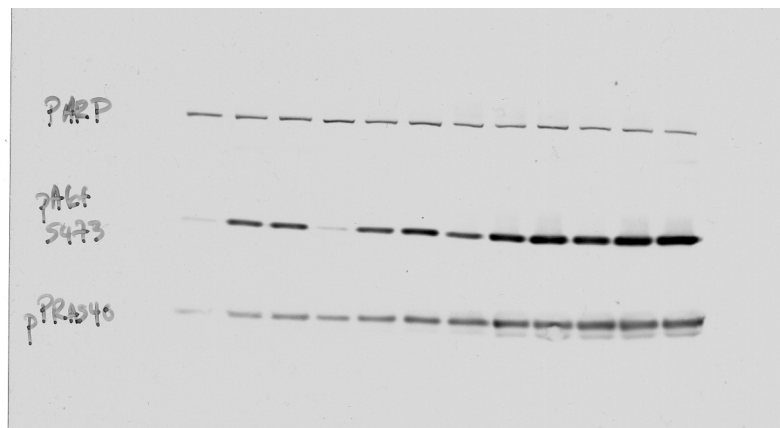

Figure 2d - Different exposure, same molecular weight and lane markers as Page 17

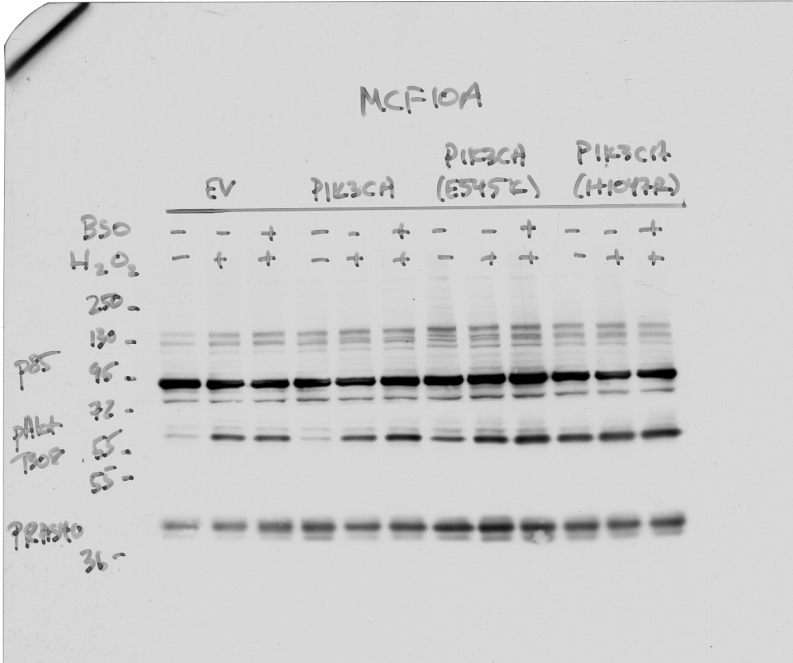

Figure 2d

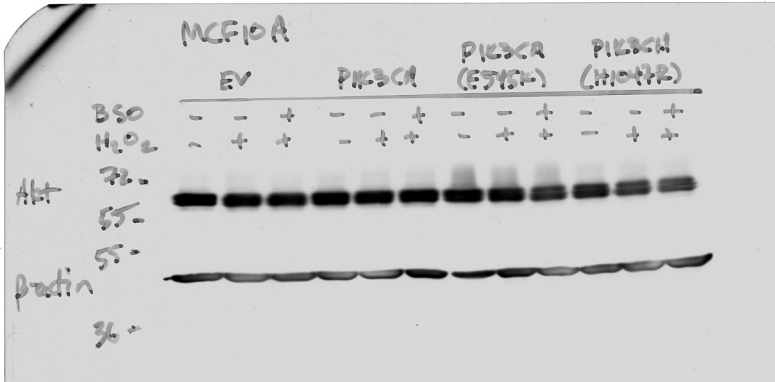

Figure 2d

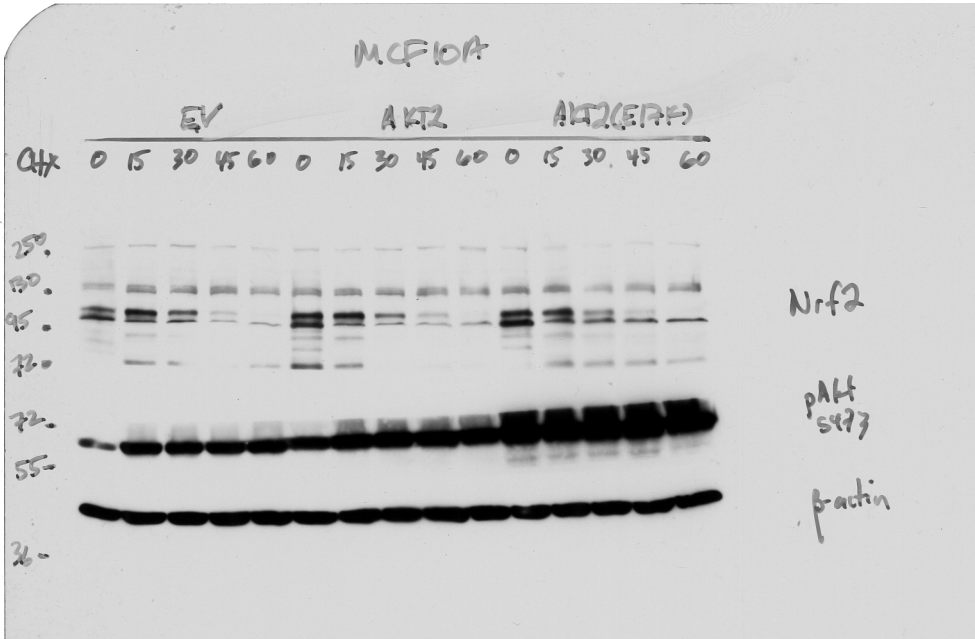

Figure 3c

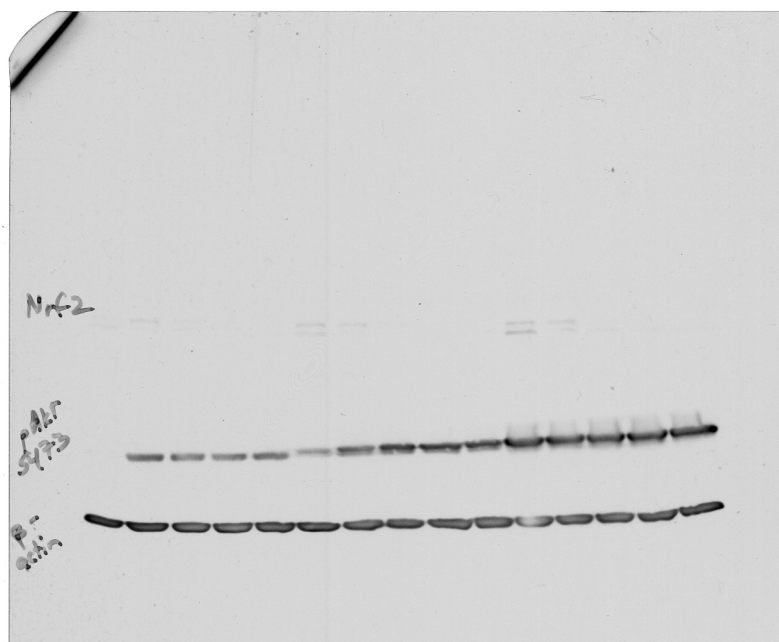

Figure 3c - Different exposure, same molecular weight and lane markers as Page 21

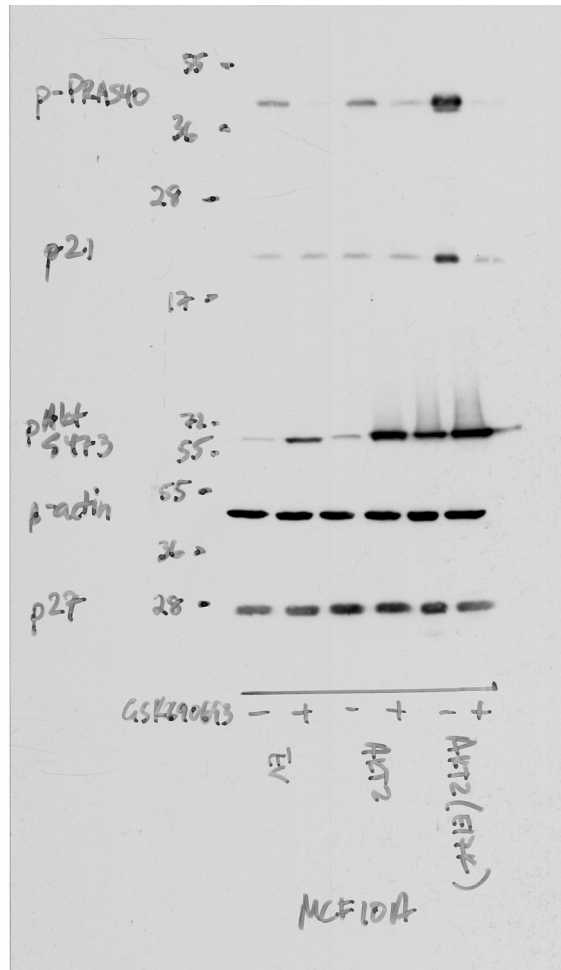

Figure 3d

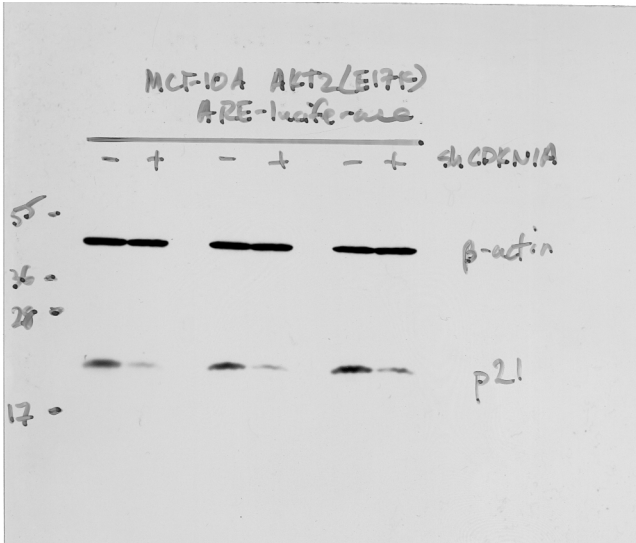

Figure 3e (left)



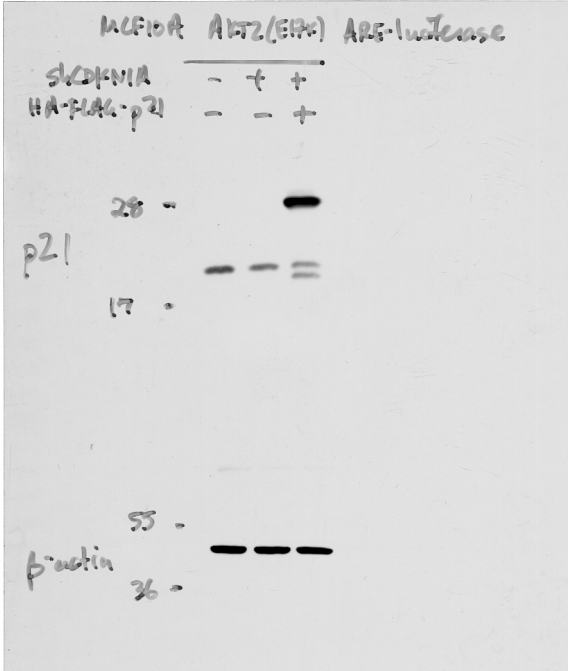

Figure 3e (right)

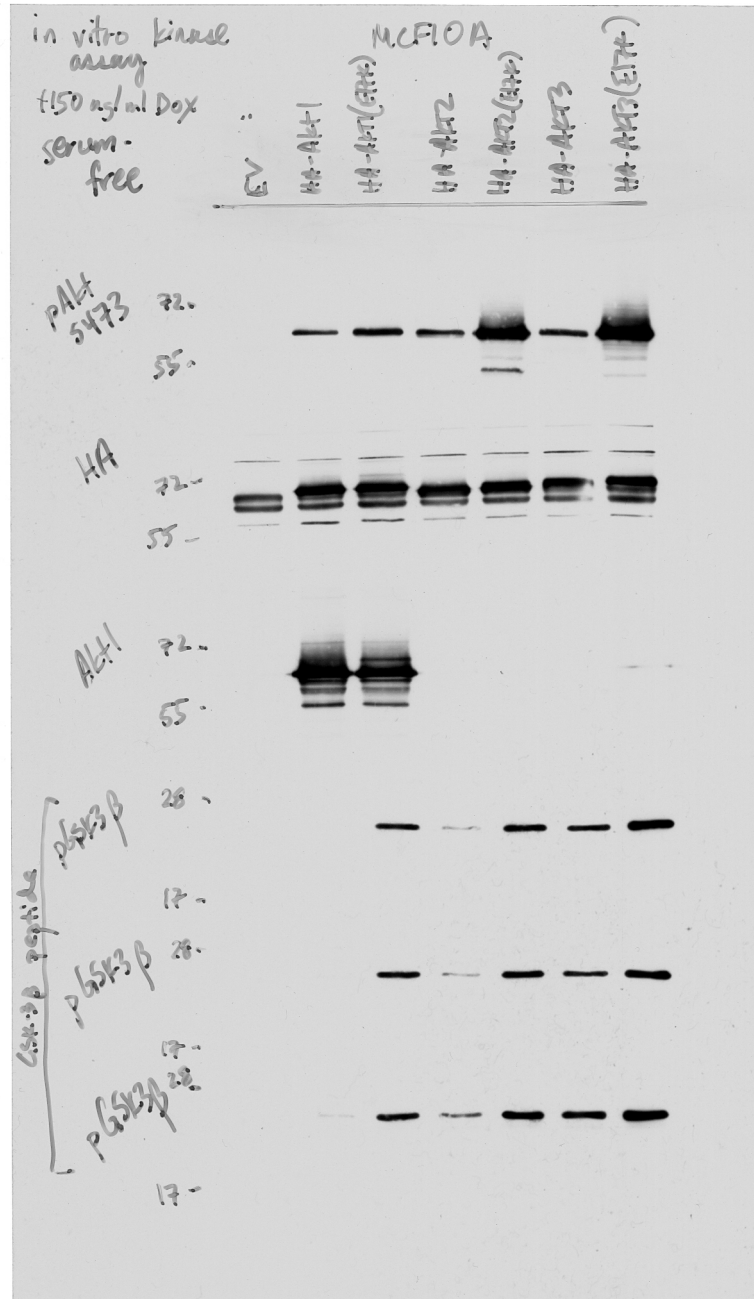

Supplementary Figure 1a

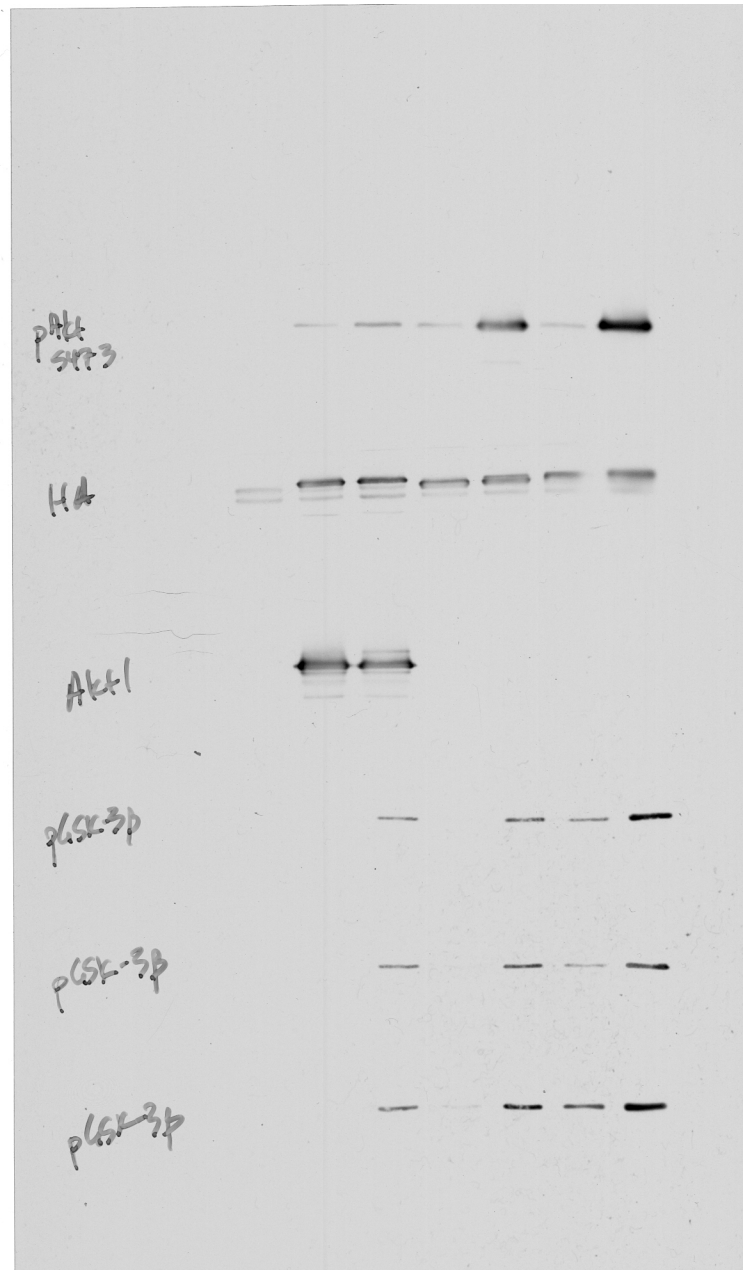

Supplementary Figure 1a - Different exposure, same molecular weight and lane markers as Page 26

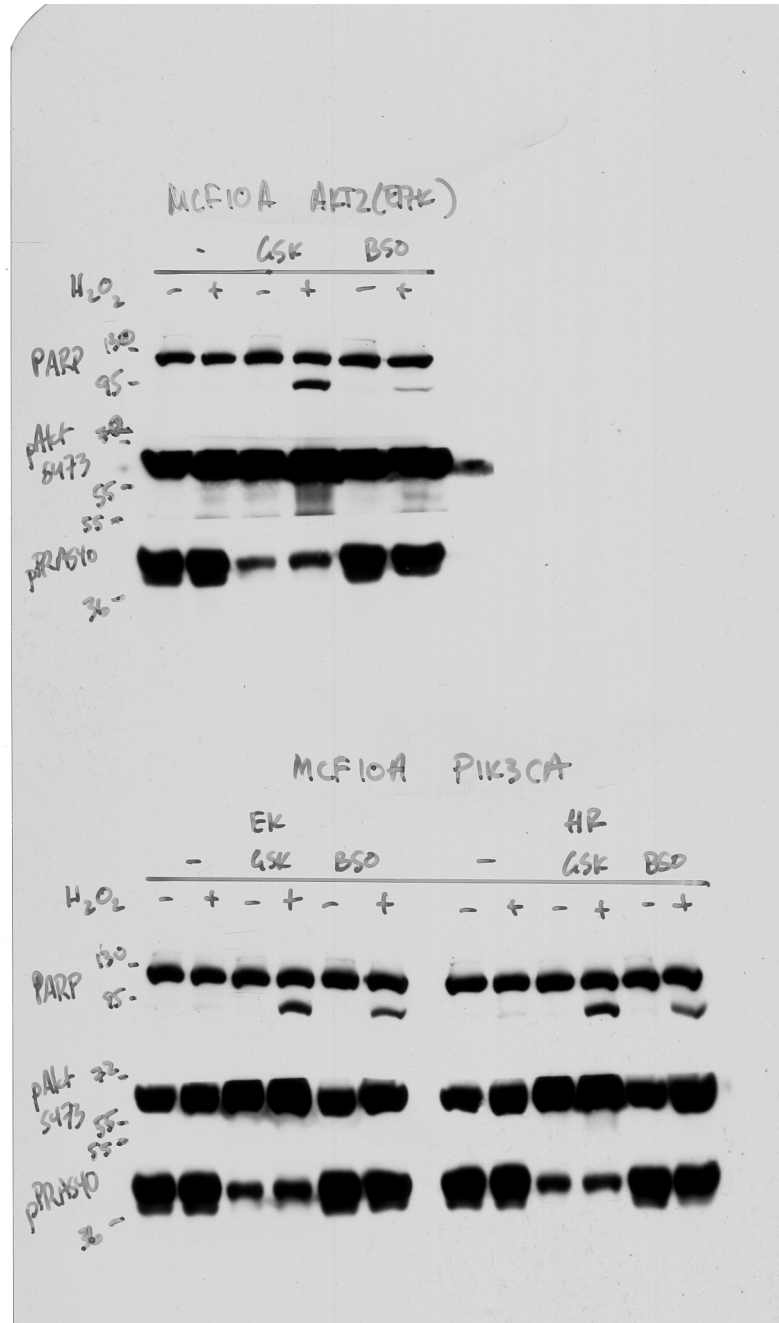

Supplementary Figure 3d-f

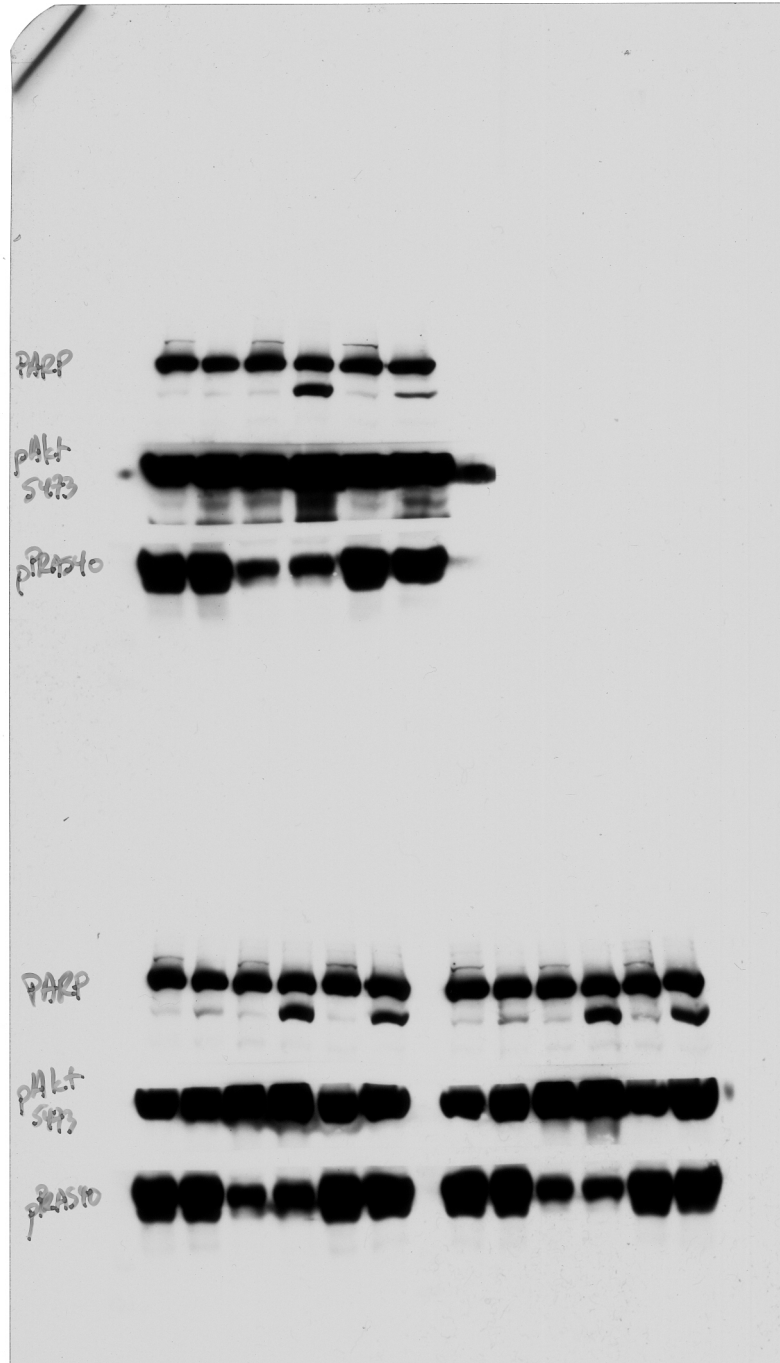

Supplementary Figure 3d-f - Different exposure, same molecular weight and lane markers as Page 28

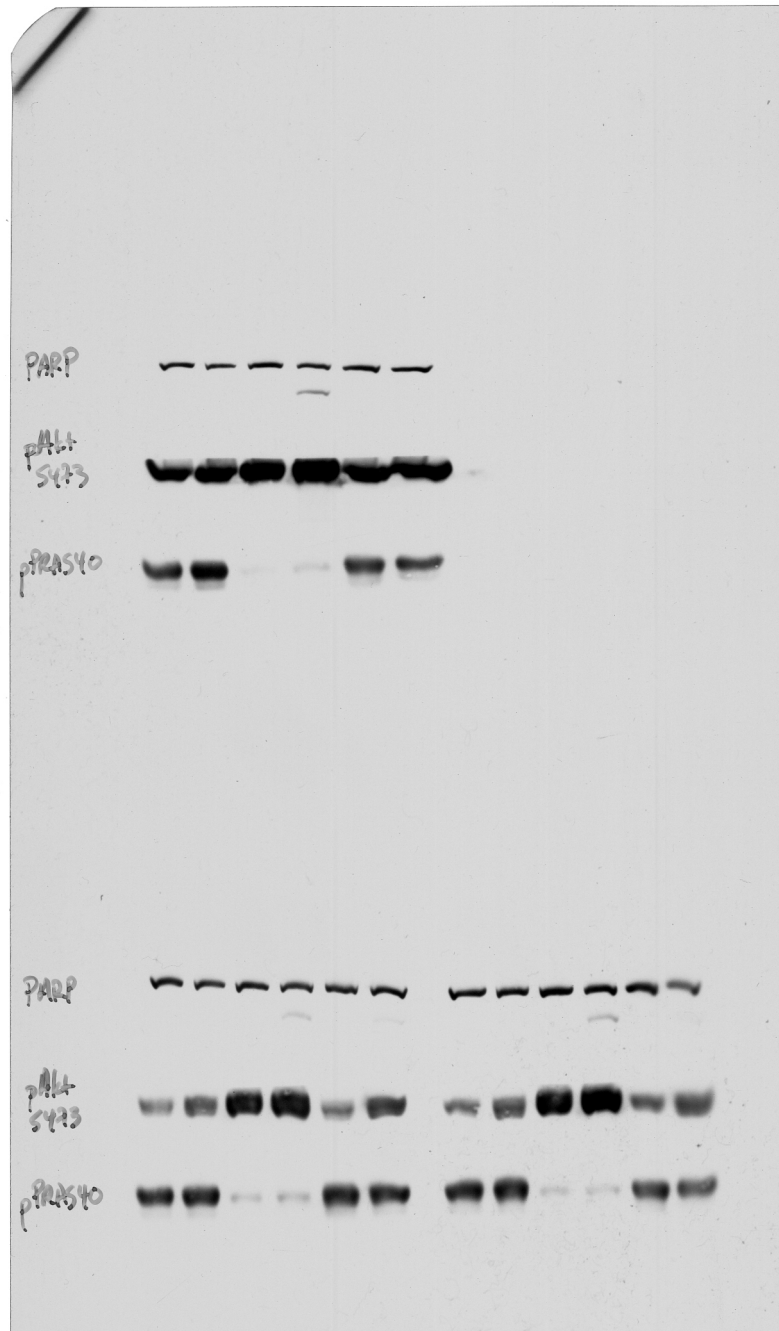

Supplementary Figure 3d-f - Different exposure, same molecular weight and lane markers as Page 28

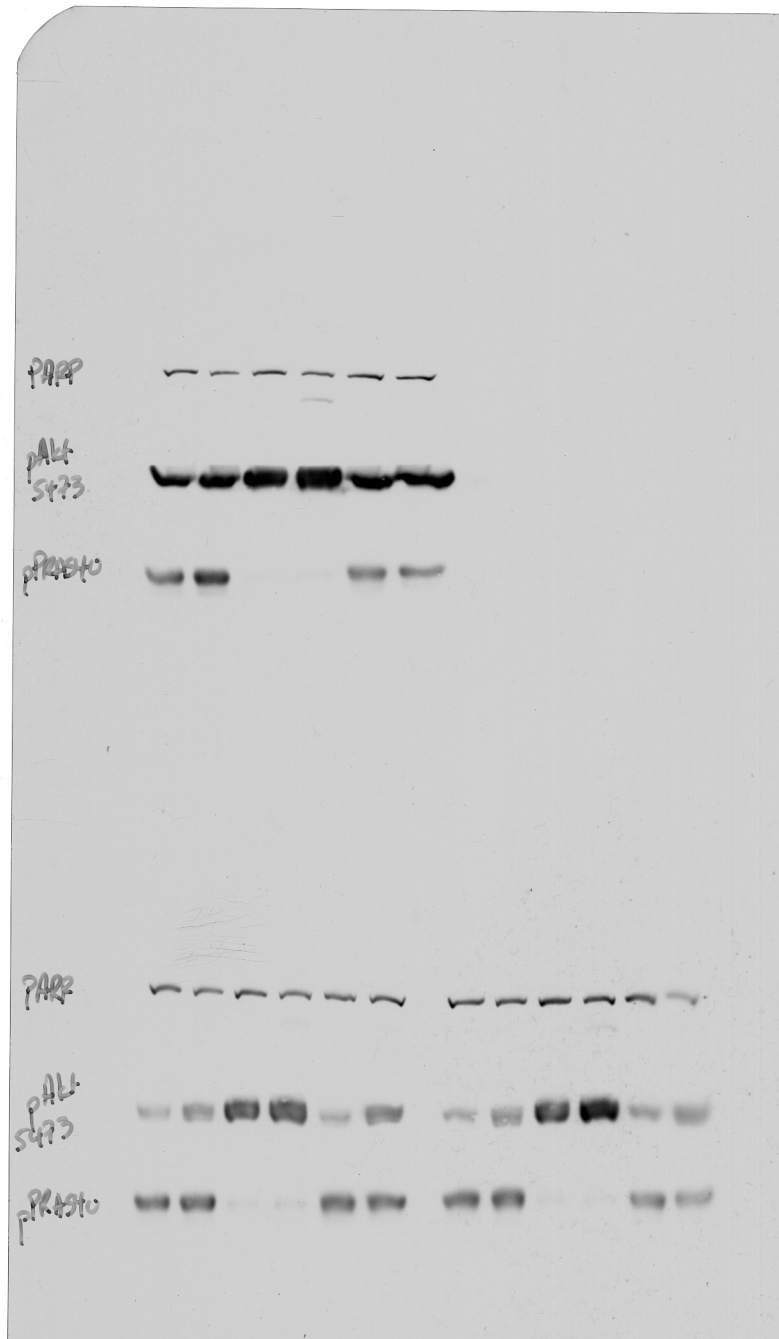

Supplementary Figure 3d-f - Different exposure, same molecular weight and lane markers as Page 28

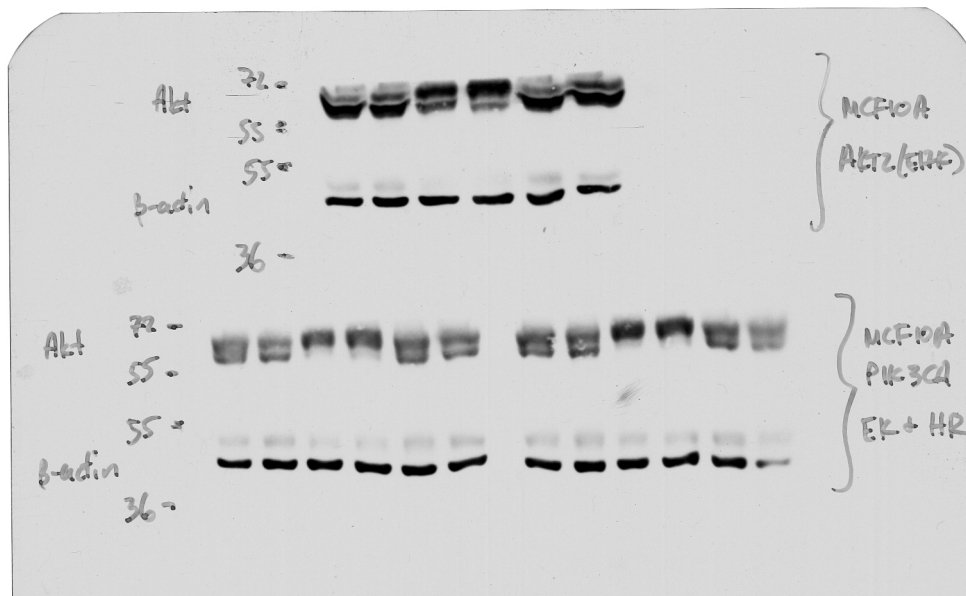



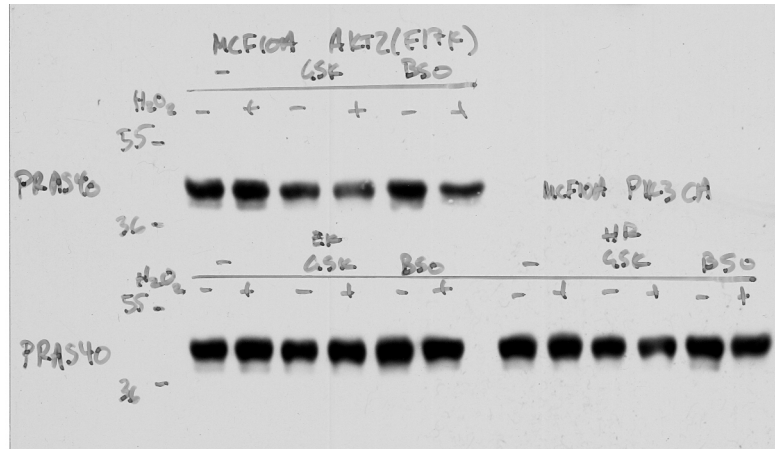

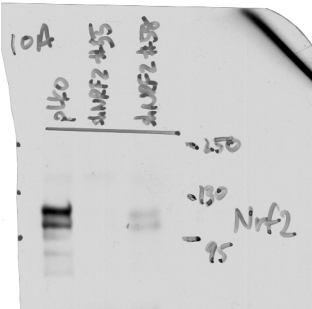

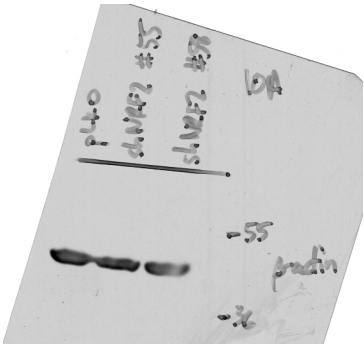

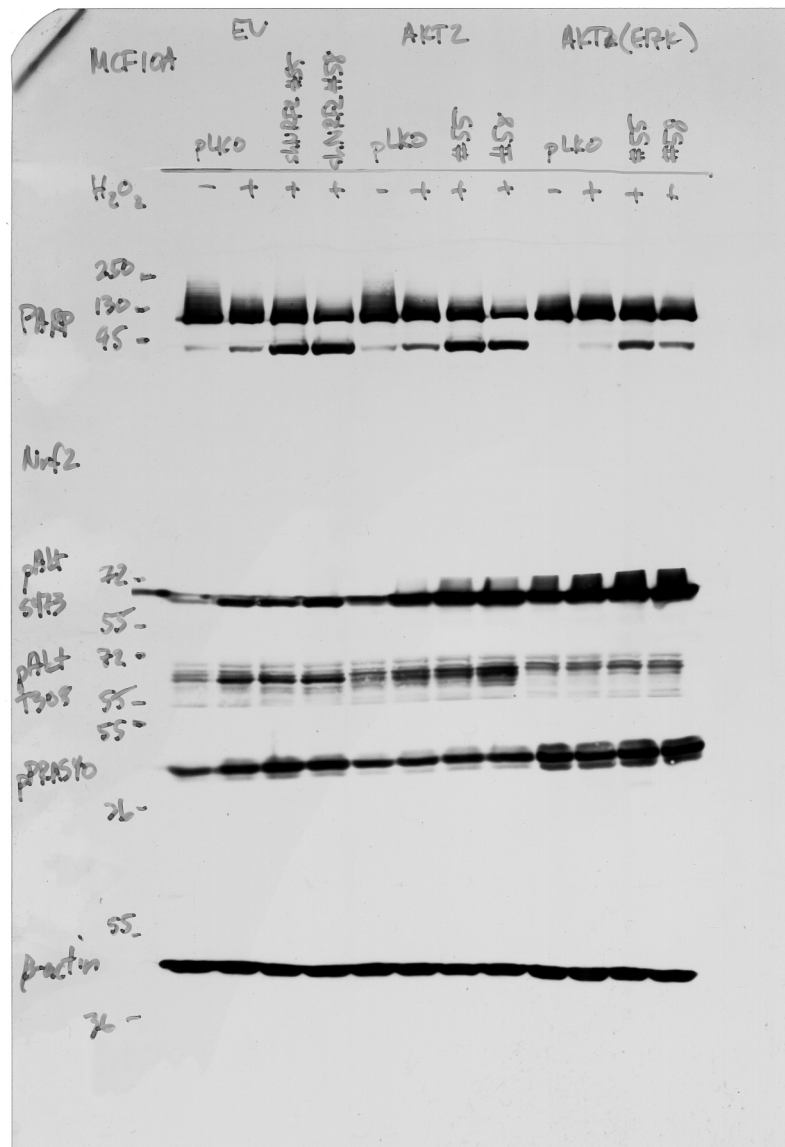

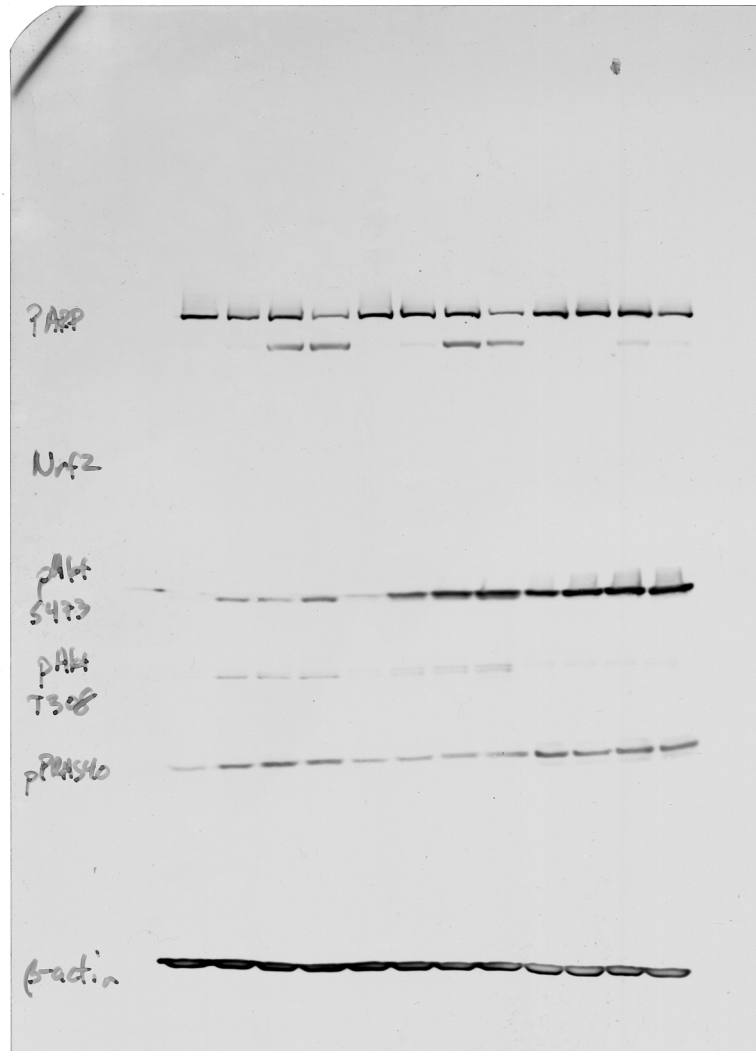

Supplementary Figure 4c - Different exposure, same molecular weight and lane markers as Page 36

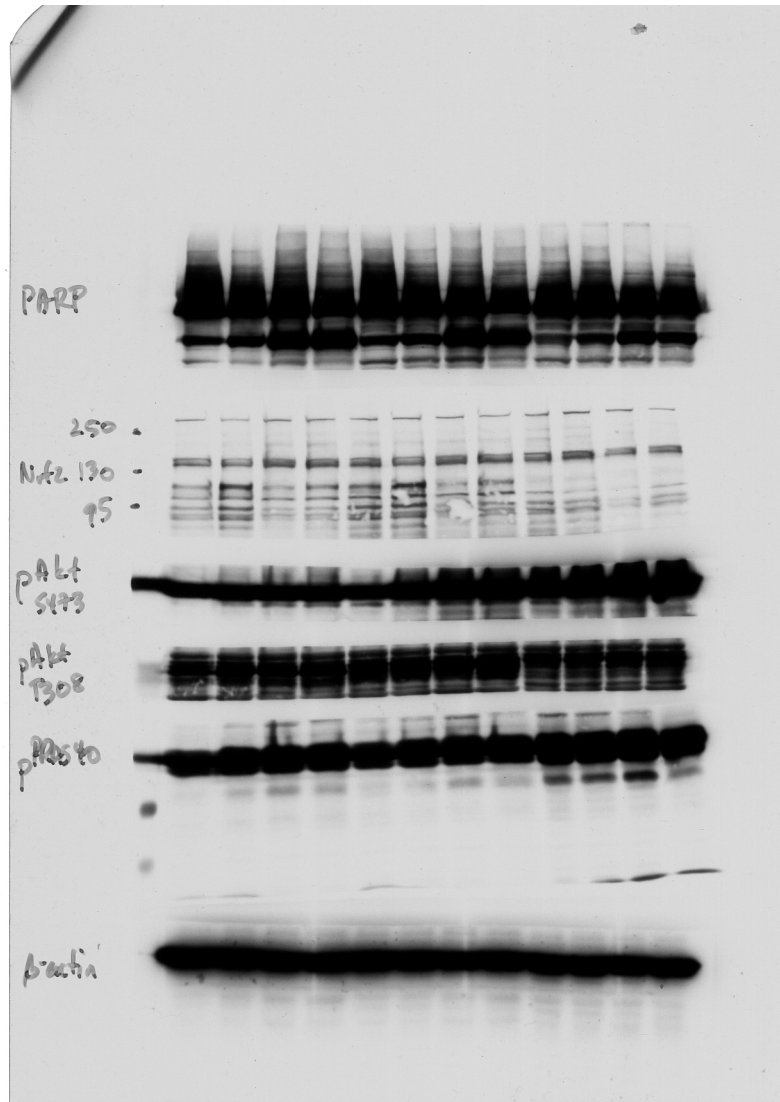

Supplementary Figure 4c - Different exposure, same molecular weight and lane markers as Page 36
